# Supplementary material
Source: MDPI journal article supplement (https://www.mdpi.com/2311-7524/9/3/362)

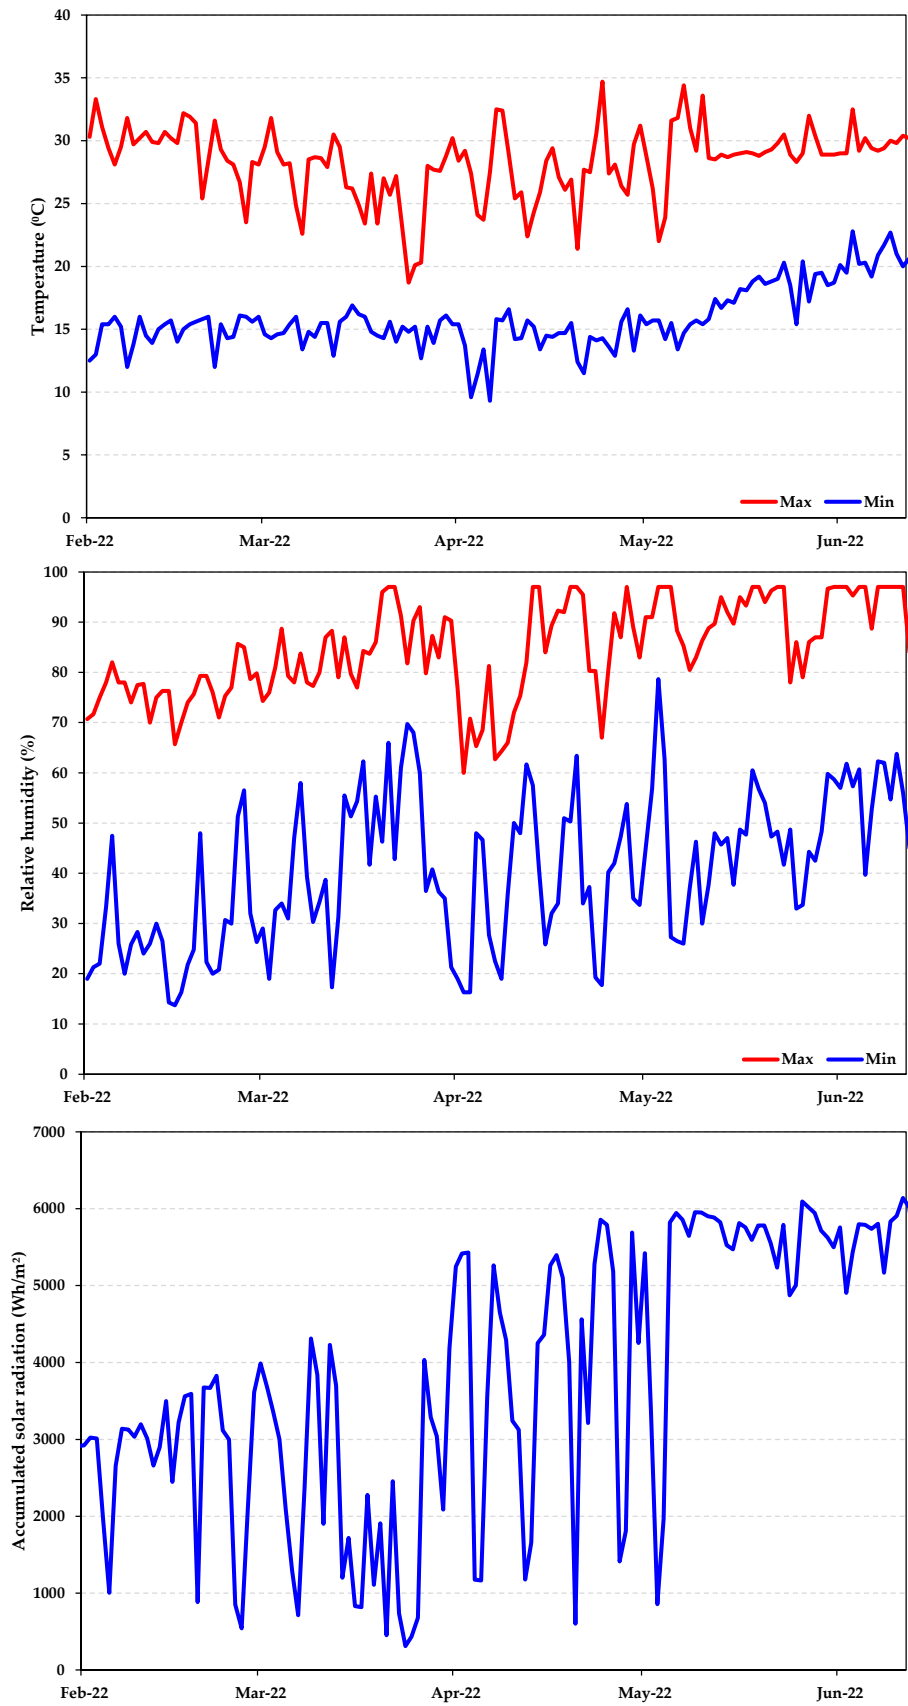

**Figure S1.** Temperature (°C), relative humidity (%) and accumulated solar radiation (Wh/m²) values.

Supplement: s1 [file s1]
